# Supplementary material for: An investigation of the internal morphology of asbestos ferruginous bodies: constraining their role in the onset of malignant mesothelioma
Source: PubMed Central journal article supplement (PMC10165766; doi:10.1186/s12989-023-00522-0), 2023-05-08
Supplement: 12989_2023_522_MOESM3_ESM.pdf [file 12989_2023_522_MOESM3_ESM.pdf]

Table S1: Mesothelioma patient details and type of asbestos present for which samples were created.

| patient            | N1 (non smoking)                        | N2 (non smoking)                        | S1 (smoking)                            | S2 (smoking)                            |
|--------------------|-----------------------------------------|-----------------------------------------|-----------------------------------------|-----------------------------------------|
| age                | 65                                      | 51                                      | 63                                      | 65                                      |
| gender             | F                                       | F                                       | M                                       | M                                       |
| type of MM         | biphagic                                | epitheloid                              | biphagic                                | biphagic                                |
| initial symptom    | chest pain                              | chest pain                              | cough                                   | cough                                   |
| occupation         | insulation industry                     | Post office                             | asbestos scrapper                       | quarrying industry                      |
| smoking experience | none                                    | none                                    | 40 years                                | 35 years                                |
|                    |                                         |                                         | Quit 1 year before operation            | Quit 6 months before operation          |
| surgery            | left extrapleural pneumonectomy         | left extrapleural pneumonectomy         | Autopsy                                 | Left extrapleural pneumonectomy         |
| surgery date       | July, 2007                              | November, 2007                          | December, 2003                          | October, 2007                           |
| AFB per dry lung   | $4.4 \times 10^5$ fibre g <sup>-1</sup> | $4.0 \times 10^3$ fibre g <sup>-1</sup> | $3.2 \times 10^5$ fibre g <sup>-1</sup> | $7.9 \times 10^3$ fibre g <sup>-1</sup> |
